# Supplementary material
Source: PubMed Central journal article supplement (PMC6592821)
Supplement: EMS83454-supplement-Supplementary_table_2.pdf [file EMS83454-supplement-Supplementary_table_2.pdf]

|                          |                       | Fed conditions |               | Fasting conditions |                |
|--------------------------|-----------------------|----------------|---------------|--------------------|----------------|
|                          |                       | Control        | H-HIFKO       | Control            | H-HIFKO        |
| Normal Diet<br>(5 weeks) | Blood glucose (mg/dl) | 150.6 ± 3.4    | 142.4 ± 4.5   | 82.2 ± 3.7         | 84.4 ± 4.7     |
|                          | Serum Insulin (ng/ml) | 0.225 ± 0.045  | 0.250 ± 0.038 | 0.1333 ± 0.033     | 0.1333 ± 0.030 |
| HFSD<br>(5 weeks)        | Blood glucose (mg/dl) | 150.9 ± 4.9    | 150.9 ± 3.8   | 83.8 ± 4.5         | 83.0 ± 4.3     |
|                          | Serum Insulin (ng/ml) | 2.167 ± 0.189  | 2.267 ± 0.265 | 0.217 ± 0.098      | 0.280 ± 0.080  |
| HFSD<br>(20 weeks)       | Blood glucose (mg/dl) | 166.9 ± 9.5    | 163.4 ± 8.7   | 109.0 ± 4.4        | 124.3 ± 6.0 *  |
|                          | Serum Insulin (ng/ml) | 8.543 ± 3.418  | 9.420 ± 3.596 | 1.400 ± 0.229      | 1.280 ± 0.171  |

Supplementary Table 2

**Biochemical analysis of blood glucose and serum insulin.**

Control and H-HIFKO mice (n = 8) were fed either normal diets or HFSD for the indicated time. Blood glucose levels and serum insulin levels were determined in mice treated with or without fasting for 16 h. Values are mean ± SEM. \**P*<0.05 compared to control mice.
